# Supplementary material for: Acquired PIK3CA amplification causes resistance to selective phosphoinositide 3-kinase inhibitors in breast cancer
Source: PubMed Central journal article supplement — Oncogenesis. 2013 Dec 23;2(12):e83–. doi: 10.1038/oncsis.2013.46 (PMC3940863; doi:10.1038/oncsis.2013.46), 2013-12-23

Figure S1

A

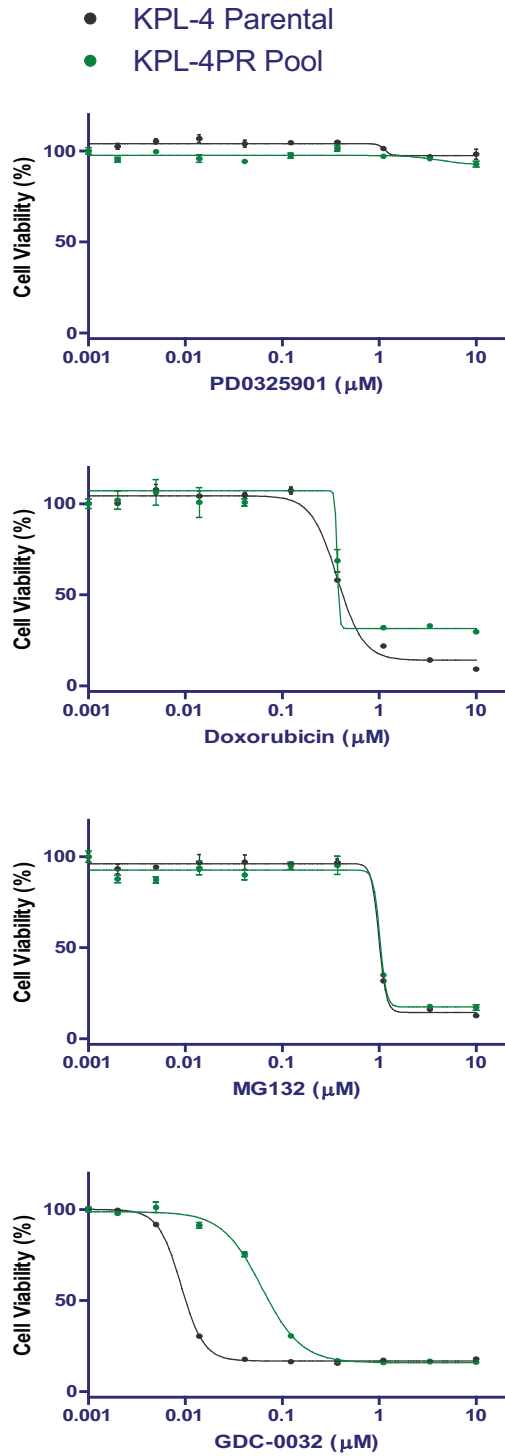

B

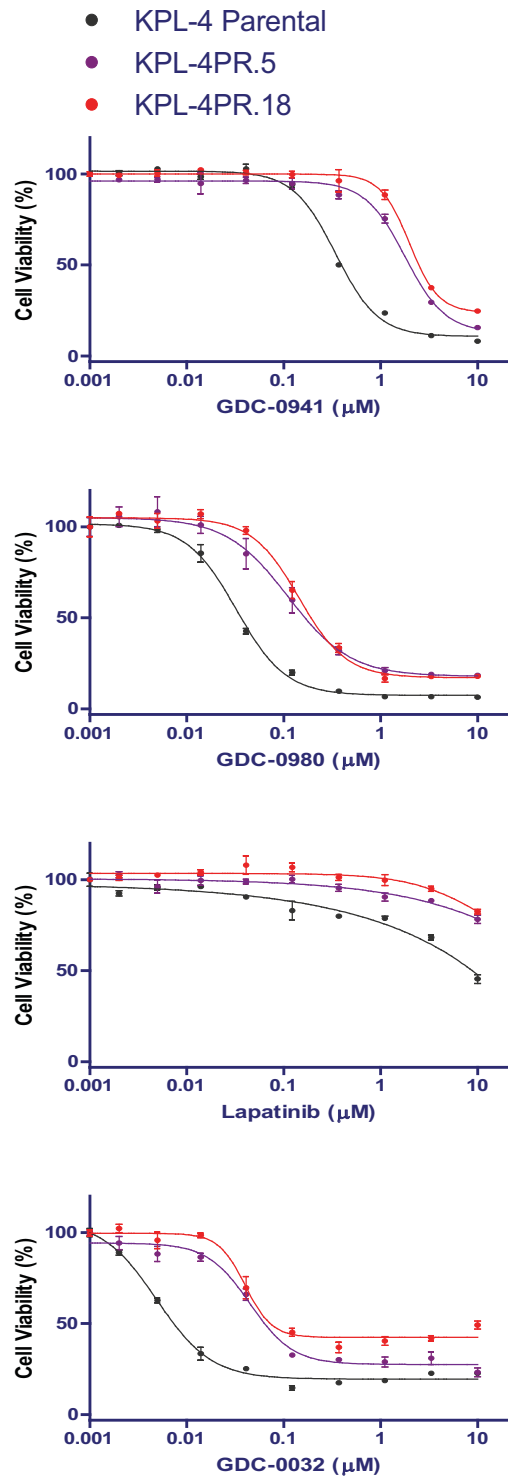

Figure S2

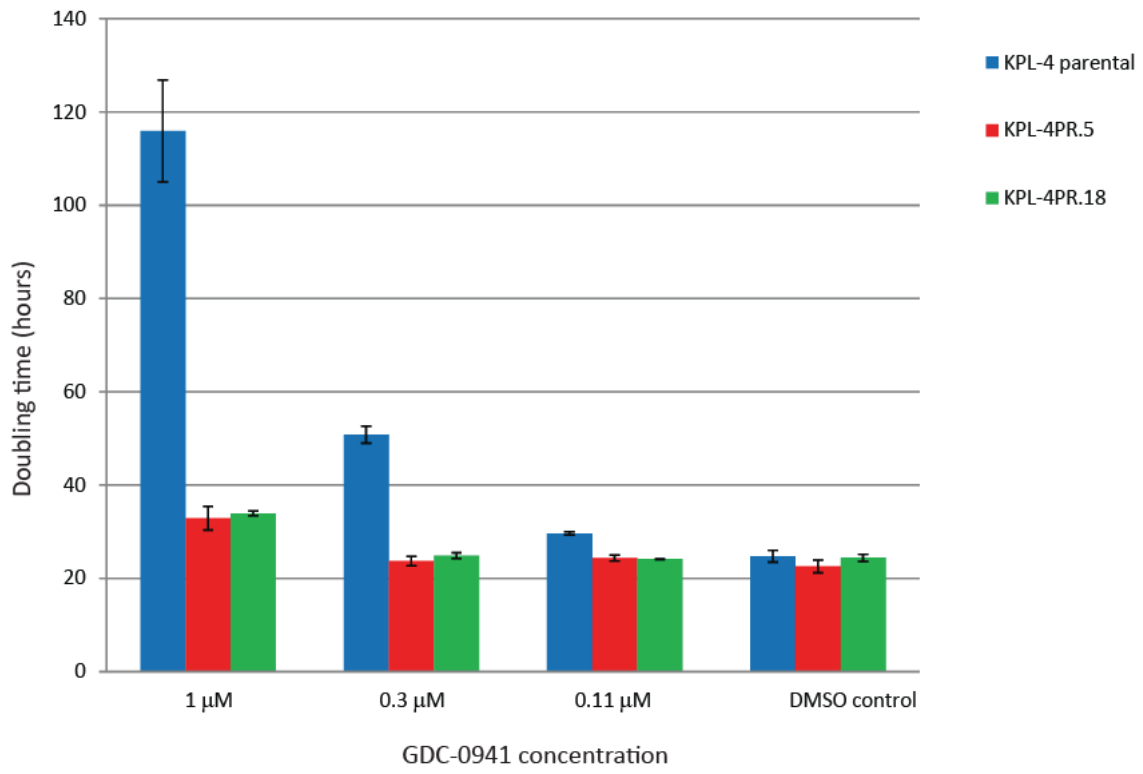

# Figure S3

## RTK Protein Array Endpoints

### Receptor Tyrosine Kinases

| Target           | Phosphorylation Site | Family    |
|------------------|----------------------|-----------|
| 1 EGFR/ErbB1     | pan-Tyr              | EGFR      |
| 2 HER2/ErbB2     | pan-Tyr              | EGFR      |
| 3 HER3/ErbB3     | pan-Tyr              | EGFR      |
| 4 FGFR1          | pan-Tyr              | FGFR      |
| 5 FGFR3          | pan-Tyr              | FGFR      |
| 6 FGFR4          | pan-Tyr              | FGFR      |
| 7 InsR           | pan-Tyr              | Insulin R |
| 8 IGF-IR         | pan-Tyr              | Insulin R |
| 9 TrkA/NTRK1     | pan-Tyr              | NGFR      |
| 10 TrkB/NTRK2    | pan-Tyr              | NGFR      |
| 11 Met/HGFR      | pan-Tyr              | HGFR      |
| 12 Ron/MST1R     | pan-Tyr              | HGFR      |
| 13 Ret           | pan-Tyr              | Ret       |
| 14 ALK           | pan-Tyr              | LTK       |
| 15 PDGFR         | pan-Tyr              | PDGFR     |
| 16 c-Kit/SCFR    | pan-Tyr              | PDGFR     |
| 17 FLT3/Flk2     | pan-Tyr              | PDGFR     |
| 18 M-CSFR/CSF-1R | pan-Tyr              | PDGFR     |
| 19 EphA1         | pan-Tyr              | EphR      |
| 20 EphA2         | pan-Tyr              | EphR      |
| 21 EphA3         | pan-Tyr              | EphR      |
| 22 EphB1         | pan-Tyr              | EphR      |
| 23 EphB3         | pan-Tyr              | EphR      |
| 24 EphB4         | pan-Tyr              | EphR      |
| 25 Tyro3/Dtk     | pan-Tyr              | Axl       |
| 26 Axl           | pan-Tyr              | Axl       |
| 27 Tie2/TEK      | pan-Tyr              | Tie       |
| 28 VEGFR2/KDR    | pan-Tyr              | VEGFR     |

### Signaling Nodes

| Target                  | Phosphorylation Site | Family |
|-------------------------|----------------------|--------|
| 29 Akt/PKB/Rac          | Thr308               | Akt    |
| 30 Akt/PKB/Rac          | Ser473               | Akt    |
| 31 p44/42 MAPK (ERK1/2) | Thr202/Tyr204        | MAPK   |
| 32 S6 Ribosomal Protein | Ser235/236           | RSK    |
| 33 c-Abl                | pan-Tyr              | Abl    |
| 34 IRS-1                | pan-Tyr              | IRS    |
| 35 Zap-70               | pan-Tyr              | Zap-70 |
| 36 Src                  | pan-Tyr              | Src    |
| 37 Lck                  | pan-Tyr              | Src    |
| 38 Stat1                | Tyr701               | Stat   |
| 39 Stat3                | Tyr705               | Stat   |

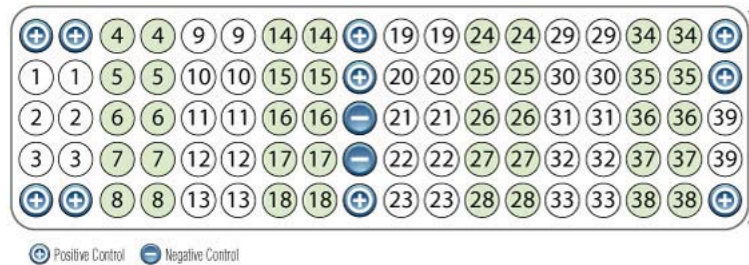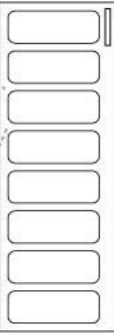

Figure S4

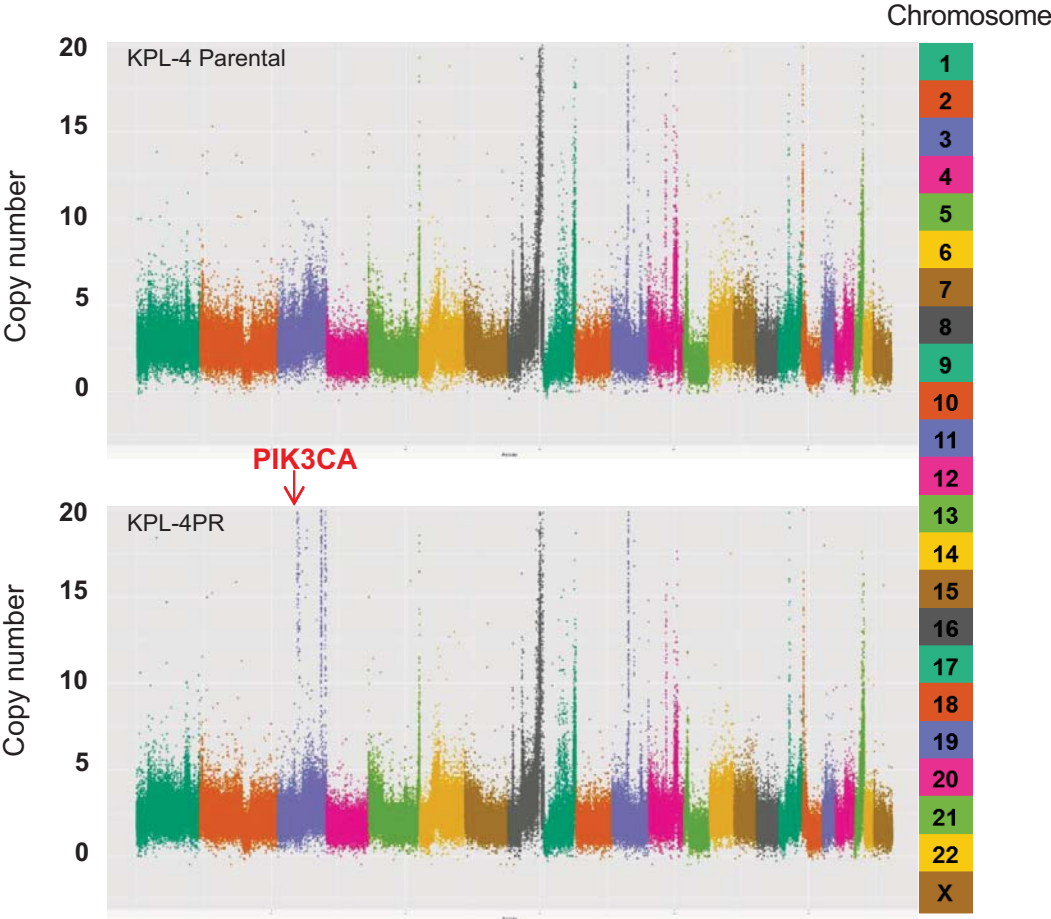

Figure S5

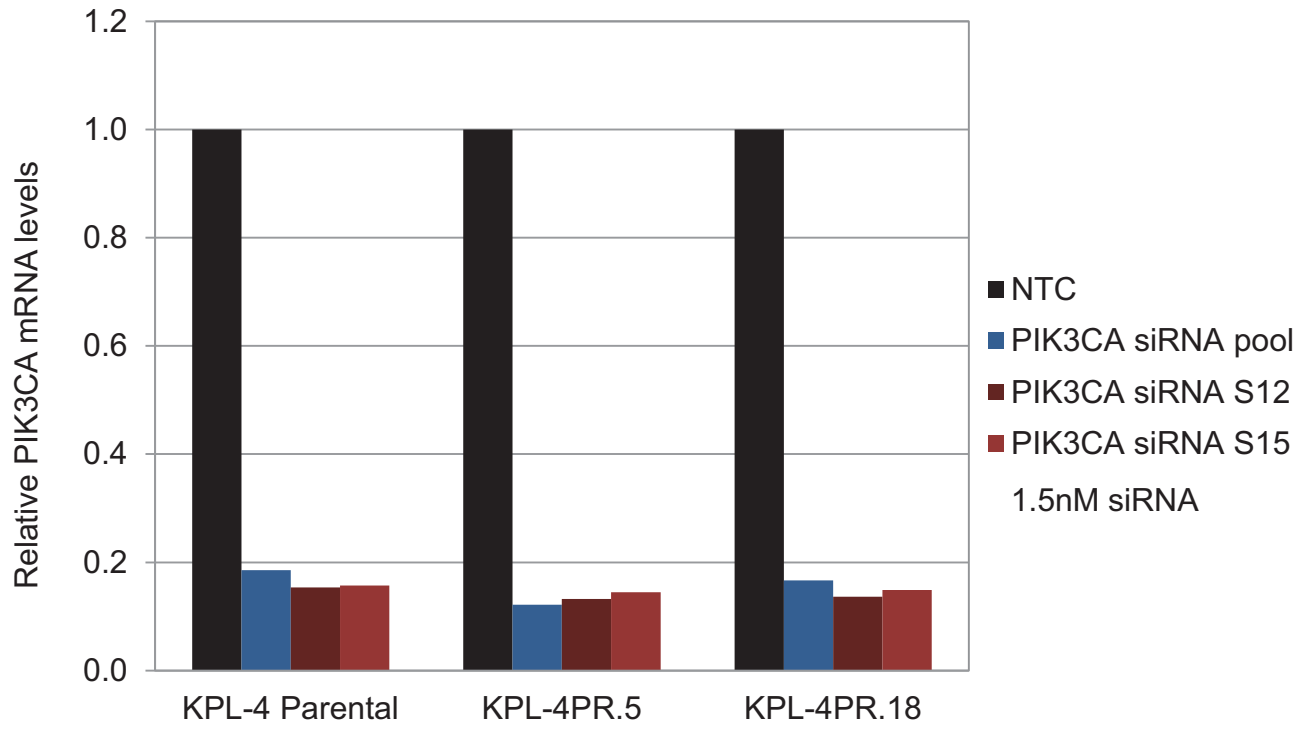

Supplement: oncsis201346x1.pdf [file oncsis201346x1.pdf]
